# The relative impact of evolving pleiotropy and mutational correlation on trait divergence.

Jobran Chebib<sup>\*,†</sup> and Frédéric Guillaume<sup>\*,‡,1</sup>

<sup>\*</sup>*Department of Evolutionary Biology and Environmental Studies, University of Zürich, Winterthurerstrasse 190, Zürich, Switzerland. CH-8057*

<sup>†</sup>*Institute of Evolutionary Biology, University of Edinburgh, Edinburgh, EH9 3FL, UK*

<sup>‡</sup>*Organismal and Evolutionary Biology Research Program, University of Helsinki, Helsinki, Finland*

---

## Abstract

Both pleiotropic connectivity and mutational correlations can restrict the decoupling of traits under divergent selection, but it is unknown which is more important in trait evolution. In order to address this question, we create a model that permits within-population variation in both pleiotropic connectivity and mutational correlation, and compare their relative importance to trait evolution. Specifically, we developed an individual-based, stochastic model where mutations can affect whether a locus affects a trait and the extent of mutational correlations in a population. We find that traits can decouple whether there is evolution in pleiotropic connectivity or mutational correlation but when both can evolve then evolution in pleiotropic connectivity is more likely to allow for decoupling to occur. The most common genotype found in this case is characterized by having one locus that maintains connectivity to all traits and another that loses connectivity to the traits under stabilizing selection (subfunctionalization). This genotype is favoured because it allows the subfunctionalized locus to accumulate greater

---

<sup>1</sup>Organismal and Evolutionary Biology Research Program, University of Helsinki, Helsinki, Finland E-mail: frederic.guillaume@helsinki.fi

effect size alleles, contributing to increasingly divergent trait values in the traits under divergent selection without changing the trait values of the other traits (genetic modularization). These results provide evidence that partial subfunctionalization of pleiotropic loci may be a common mechanism of trait decoupling under regimes of corridor selection.

---

## 1 Introduction

2 One of the central problems in evolutionary biology is understanding the  
3 processes through which new traits arise. One process that can lead to the  
4 creation of new traits is when existing traits become differentiated from one  
5 another because they are selected for a new purpose (Rueffler et al., 2012).  
6 There has long been evidence that this can happen through gene duplica-  
7 tion followed by trait decoupling (Muller, 1936; Ohno, 1970; Rastogi and  
8 Liberles, 2005; Han et al., 2009). One example in vertebrates is the dif-  
9 ferentiation of forelimbs from hind limbs, where the same gene that was  
10 responsible for both fore and hind limb identity in development diverged  
11 (Graham and McGonnell, 1999; Minguillon et al., 2009; Petit et al., 2017).  
12 In this case, the paralogous genes *Tbx4/Tbx5* that encode transcription fac-  
13 tors for fore/hindlimb identity likely evolved from the same ancestral gene,  
14 and their expression differentiated after duplication (Minguillon et al., 2009).  
15 Somehow during selection for functional divergence, there was a decoupling  
16 of genetically integrated traits, which allowed them to respond to selection as  
17 independent genetic modules (Wagner and Altenberg, 1996; Hansen, 2006).  
18 Genetic decoupling was likely also responsible for the evolution of trait di-  
19 vergence in vertebrate metameric segmentation into differentiated somites,  
20 and the emergence of cell differentiation in multicellular organisms (Holley  
21 2007; Wagner et al. 2019; but see Newman 2020).

22 Although modular structures in phenotypic covariation (where pheno-  
23 typic variation is more correlated within groups of traits than between them)  
24 are found in a wide range of organisms, including yeast, round worms, mice,

25 and humans (Jiang et al., 2008; Wang et al., 2010; Hlusko, 2016), the un-  
26 derlying genetic architectures producing genetic integration between traits  
27 are still uncertain. Genetic integration, constraining the decoupling of traits,  
28 may arise from pleiotropic connections between loci and traits, where they  
29 may or may not create genetic and phenotypic covariation (Batz and Wag-  
30 ner, 1997; Kenney-Hunt et al., 2008; Smith, 2016). When selection favours  
31 the divergence of traits, the constraining effect of pleiotropy may come in  
32 two forms: a pleiotropic connectivity effect **or** a mutational correlation ef-  
33 fect (Stern, 2000). A pleiotropic connectivity effect depends on how highly  
34 pleiotropically connected a gene is. For instance, a gene product (e.g. en-  
35 zyme, transcription factor, etc.) may affect more than one trait (or func-  
36 tion) by having multiple substrates or binding sites, thus affecting multiple  
37 downstream processes. This may constrain the evolutionary divergence of  
38 those traits because the effect of a mutation beneficial for one trait may be  
39 deleterious for other traits (when those other traits are under stabilizing se-  
40 lection). It is expected that the net fitness effect of a pleiotropic mutation is  
41 decreased in proportion to the number of traits it affects (Orr, 2000; Welch  
42 and Waxman, 2003; Martin and Lenormand, 2006). Therefore, a pleiotropic  
43 connectivity effect can constrain divergent trait evolution even without creat-  
44 ing genetic correlation among traits (a.k.a, hidden pleiotropy Wagner, 1989;  
45 Batz and Wagner, 1997). Whereas, a mutational correlation effect is the  
46 effect of a mutation affecting how correlated are the effects of mutations at  
47 pleiotropic loci. Thus, a mutational correlation effect may induce correlated  
48 changes in the traits affected by pleiotropic loci. However, the strength of  
49 the correlational effect of the mutations is not dependent on the number of  
50 traits affected but on the properties of the genes, processes, or traits affected.  
51 When those effects are correlated among traits, they can constrain trait de-  
52 coupling in addition to those caused by the dimensionality of the pleiotropic  
53 loci (Lande, 1979; Arnold, 1992; Stern, 2000).

54 Biological examples may help to illuminate the distinction between the

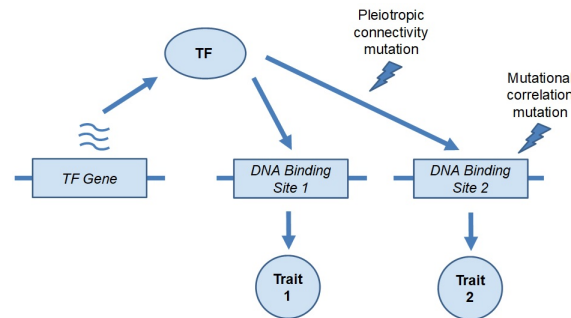

Figure 1: The two types of mutations affecting pleiotropic effects using a transcription factor (TF) as an example.

55 two types of pleiotropy that can hinder the decoupling of traits. Imagine  
56 a transcription factor (TF) that has multiple target binding sites affecting  
57 the expression of multiple genes, which in turn affect several traits. If the  
58 binding sites have identical sequences, then mutations in the gene encoding  
59 the TF are expected to be in perfect correlation with respect to their effects  
60 on the traits. In this scenario, a mutational correlation mutation may be a  
61 mutation in one of the binding sequences that leads to differential binding of  
62 the transcription factor (Figure 1). Now, that the binding sites are no longer  
63 identical, mutations in the gene encoding the TF may no longer have per-  
64 fectly correlated effects on the traits. As the name suggests, the mutational  
65 correlation mutation has affected the correlation between effects of mutations  
66 in the TF's gene on the traits it affects. Whereas, another type of mutation  
67 might affect a TF's access to one of its binding sites (e.g. by methylating  
68 the DNA in the region of that binding site). If this type of mutation causes  
69 the TF to affect more or less traits than it did before the mutation, it would  
70 be considered a pleiotropic connectivity mutation.

71 Both pleiotropic connectivity and mutational correlations can evolve as a  
72 result of divergent selection and affect the ability of traits to decouple from  
73 one another. Although previous models have included either evolution in  
74 pleiotropic connections or mutational correlation, their relative importance

75 in constraining trait decoupling remains to be seen (Jones et al., 2003, 2007;  
76 Melo and Marroig, 2015; Chebib and Guillaume, 2017). Here we attempt  
77 to answer this question by using stochastic simulations, where individuals  
78 in a population can vary in both pleiotropic connections and mutational  
79 correlations, while applying divergent selection on some traits but not others,  
80 and then observing what affects the decoupling of traits.

## 81 **Methods**

### 82 *Simulation model*

83 We modified the individual-based, forward-in-time, population genetics  
84 simulation software Nemo (v2.3.46) (Guillaume and Rougemont, 2006) to  
85 allow for the evolution of pleiotropic connectivity and mutational correla-  
86 tions. The simulations consisted of a single population of size  $N$  of randomly  
87 mating, hermaphroditic, diploid individuals, with a probability  $1/N$  of self-  
88 fertilization, similar to a classical Wright-Fisher population model. Each  
89 individual had two pleiotropic QTLs affecting four traits. The phenotypic  
90 value of each trait,  $z_i$ , was calculated by adding the allelic values at the two  
91 loci:  $z_i = \sum_{l=1}^L (X_{i,l} + Y_{i,l})$ , where  $X$  is the maternally inherited allele and  
92  $Y$  the paternally inherited allele,  $i$  is the trait number ( $i \in [1, 4]$ ), and  $L$   
93 is the locus number ( $L \in [1, 2]$ ) (Figure 2). For simplicity, we assumed no  
94 environmental variance (i.e. heritability is 1).

95 Generations were non-overlapping and consisted of three main stages:  
96 mating, viability selection, ageing. In the mating stage, pairs of individuals  
97 were chosen to produce offspring (with a mean fecundity of three offspring  
98 to ensure population size replenishment). It was during the mating stage  
99 that recombination between loci and mutations occurred. In the viability  
100 selection stage, Gaussian stabilizing selection was applied on offspring and  
101 determined the survival probability of individuals, whose fitness was calcu-  
102 lated as  $w = \exp \left[ -\frac{1}{2} ((\mathbf{z} - \theta)^T \cdot \mathbf{\Omega}^{-1} \cdot (\mathbf{z} - \theta)) \right]$ , where  $\mathbf{z}$  is the individual  
103 trait value vector,  $\theta$  is the vector of local optimal trait values, and  $\mathbf{\Omega}$  is the

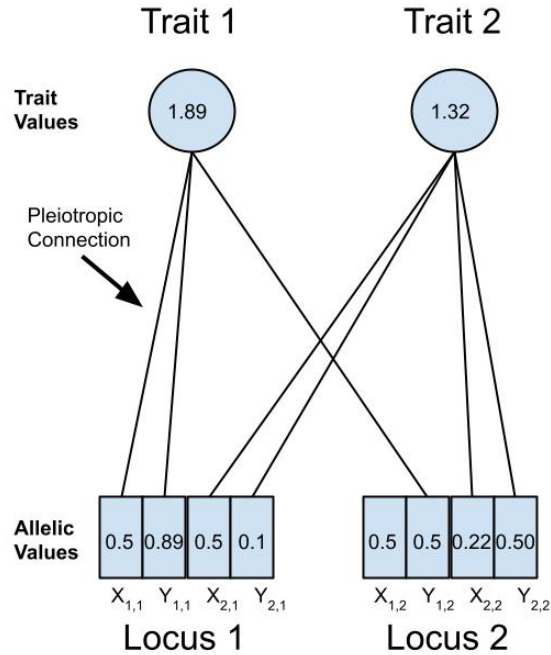

Figure 2: Pictorial representation of quantitative trait locus (QTL) alleles and the traits they affect with example values for illustration. Here, Trait 1 has a value of 1.89 determined by the sum of allelic values ( $X_{1,1}$ ,  $Y_{1,1}$ , and  $Y_{1,2}$ ) pleiotropically connected to it from Locus 1 ( $0.5 + 0.89$ ) and Locus 2 ( $0.5$ ), where  $Y_{1,2}$  represents the maternally inherited allele of Locus 2 that affects Trait 1. Trait 2 is affected differently by the two loci and has a value of 1.32 ( $0.5 + 0.1 + 0.22 + 0.5$ ). The allelic values of a QTL were affected by mutation at a rate of  $\mu$ . The pleiotropic connections between a QTL and a trait could be removed or added by mutation at a rate of  $\mu_{pleio}$ , and toggled whether an allelic value was added to a trait value or not.

104 selection variance-covariance matrix ( $n \times n$ , for  $n$  traits) describing the mul-  
 105 tivariate Gaussian selection surface. The  $\Omega$  matrix is a diagonal matrix with  
 106 diagonal elements corresponding to the strength of selection,  $\omega^2$ , on each  
 107 trait (where strength of selection scales inversely with  $\omega^2$ ), and off-diagonal  
 108 elements corresponding to the strength of correlational selection,  $\rho_{wij}$ , be-  
 109 tween traits  $i$  and  $j$ . In the ageing stage, the adults were removed from  
 110 the population and the offspring matured into breeding adults for the next

111 generation.

112 Three types of mutations (each with a separate mutation rate) were pos-  
113 sible: mutations at the additive QTL affecting the traits, mutations at a set  
114 of modifier loci separately affecting the correlation of the mutational effects  
115 at the additive QTL, and mutations affecting the connectivity of the QTL to  
116 the traits, reducing or increasing the pleiotropic degree (the number of traits  
117 a locus affects) of each locus. The first type of mutations changed the allelic  
118 values of a QTL by randomly drawing effects from a multivariate normal dis-  
119 tribution, with variance-covariance matrix  $\mathbf{M}$ . The mutational effects were  
120 added to the existing allelic values at the QTL (continuum-of-alleles model;  
121 Crow and Kimura, 1964). These mutations appeared at a rate given by  $\mu$ .  
122 The variance of the mutational effect for all traits were constant and set at  
123  $\alpha^2 = 0.1$  in the diagonal of the  $\mathbf{M}$ -matrix. Each pairwise trait covariance of  
124 the  $\mathbf{M}$  matrix was governed by its own separate modifier locus. We will refer  
125 to variance-standardized covariance values, or mutational correlation  $\rho_{\mu ij}$  as  
126 the off-diagonal elements of the  $\mathbf{M}$  matrix. As  $\mathbf{M}$  is a  $4 \times 4$  symmetrical ma-  
127 trix, the 6  $\rho_{\mu ij}$  coefficients were controlled by 6 diploid modifier loci, carried  
128 by each individual and inherited in the same manner as the additive QTL.  
129 Each individual thus carried its own  $\mathbf{M}$  matrix. The second type of mutation  
130 thus changed these mutational correlation allelic values by randomly drawing  
131 from a uniform distribution ( $-0.2 * \log[1 - \mathbf{U}(0, 1)]$ ), and adding the effect to  
132 the existing allelic value (which was bound between -1 and 1). These muta-  
133 tions appeared at a rate given by  $\mu_{mutcor}$ . In order to get a particular muta-  
134 tional effect correlation,  $\rho_{\mu ij}$ , the two mutational correlation allelic values of  
135 the corresponding modifier locus were averaged together (Figure 3). All the  
136 pairwise mutational effect correlations ( $\rho_{\mu ij}$ ) were combined with mutational  
137 effect variances ( $\alpha_i^2$ ) to create the  $\mathbf{M}$  matrix for an individual, whenever a  
138 mutational effect on a QTL that directly affected traits was required. The  
139 third type of mutation affected the pleiotropic connections between QTLs  
140 and traits, determining whether the allelic value of a QTL was added to a

141 trait value. A mutation of this type affected the pleiotropic connections be-  
 142 tween a trait and the maternally or paternally inherited alleles separately.  
 143 Thus, QTLs could be ‘heterozygotes’ in their pleiotropic degree depending  
 144 on the pleiotropic degree of the maternally and paternally inherited alleles.  
 145 These mutations appeared at a rate given by  $\mu_{pleio}$  (Figure 2).

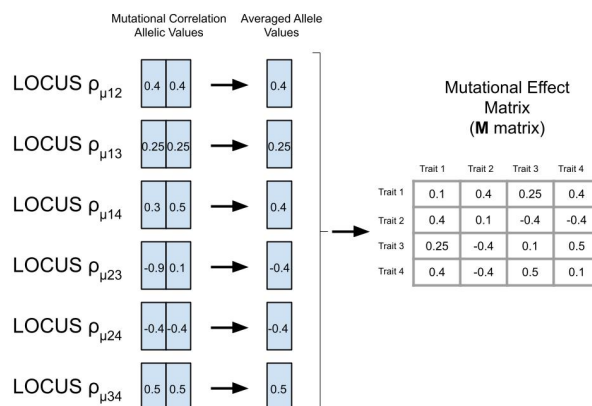

Figure 3: Pictorial representation of the modifier loci that contained the allelic values for producing the pairwise mutational effect correlations ( $\rho_{\mu ij}$ ) between Traits  $i$  and  $j$ . The allelic values of a modifier locus were affected by mutation at a rate of  $\mu_{mutcor}$ , and were averaged together to produce the corresponding correlation for the **M** matrix. The mutational effect variances,  $\alpha^2$ , remained static with a value of 0.1 for all traits.

### 146 *Experimental design*

147 To understand the impact of divergent selection on the structure of ge-  
 148 netic architecture, simulations were run with a population of 500 individuals  
 149 that had two additive loci underlying four traits (Figure 4). The initial  
 150 conditions were set to full pleiotropy (each locus affecting every trait) and  
 151 strong mutational correlations between trait pairs ( $\rho_{\mu} = 0.99$ ). This way,  
 152 mutational effects in phenotypic space were highly constrained to fall along  
 153 a single direction, and reducing variation for divergent selection. All traits  
 154 had an initial phenotypic value of 2 with equal allelic values of 0.5 at each  
 155 allele of the two QTL.



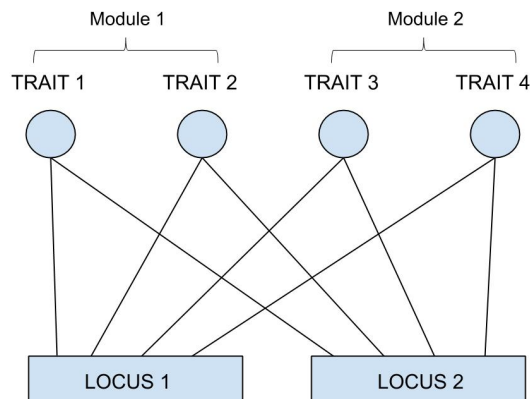

Figure 4: Pictorial representation of the genetic architecture modelled within individuals at the start of the simulations, with 2 loci, 4 traits, and full pleiotropic connectivity between them.

156 Selection regimes were designed to mimic divergent selection between  
157 trait modules, where Trait Module 1 included Traits 1 and 2, and Trait  
158 Module 2 included Traits 3 and 4. Initially, optimum trait values,  $\theta_k$ , ( $k \in$   
159  $1, 2, 3, 4$ ), were all set to 2 (the same as the initial trait values). There  
160 was moderately strong stabilizing selection on each trait ( $\omega^2 = 5$ ), strong  
161 correlational selection between traits in the same trait module ( $\rho_{\omega 12} = \rho_{\omega 34} =$   
162  $0.9$ ), and no correlation between traits in different trait modules ( $\rho_{\omega 13} =$   
163  $\rho_{\omega 14} = \rho_{\omega 23} = \rho_{\omega 24} = 0$ ). After this, divergent directional selection proceeded  
164 by maintaining constant optimal trait values for Traits 3 and 4 ( $\theta_3 = \theta_4 =$   
165  $2$ ) and increasing the optimal trait values for Traits 1 and 2 by 0.001 per  
166 generation for 5000 generations, bringing the trait optima to  $\theta_1 = \theta_2 = 7$   
167 (corridor model of selection *sensu* Wagner, 1984; Bürger, 1986). These 5000  
168 generations of divergent, directional selection on Traits 1 and 2 were then  
169 followed by 5000 generations of purely stabilizing selection.

170 In order to compare the differential effects of evolving pleiotropic connec-  
171 tivity and evolving mutational correlations on trait decoupling, nine different  
172 simulations were run with all combinations of three different rates of muta-

173 tion in pleiotropic connectivity and mutational correlations ( $\mu_{pleio}$  and  $\mu_{mutcor}$   
174 = 0, 0.001, or 0.01) representing no evolution, and mutation rates below, at  
175 and above the QTL allelic mutation rate ( $\mu = 0.001$ ), respectively.

176 Simulations were also run with initial mutational correlations between  
177 all pairs set to 0 ( $\rho_{\mu} = 0$ ) to compare highly constraining genetic architec-  
178 ture (within a corridor selection regime) to ones with no constraints in the  
179 direction of mutational effects.

180 We observed general patterns of average trait value divergence, popula-  
181 tion fitness, genetic correlation, pleiotropic degree (the number of traits a  
182 locus affects) and mutational correlation. In the case of pleiotropic degree,  
183 the two loci affecting trait values were sorted into a high and low pleiotropic  
184 degree locus for each individual before averaging over populations or repli-  
185 cates so that differential effects of the two loci were not averaged out in the  
186 final analysis. Statistics were averaged over 50 replicate simulations for each  
187 particular set of parameter values.

## 188 Results

### 189 *Trait divergence and genetic modularity under constraints to genetic decou-* 190 *pling*

191 In the absence of genetic architecture evolution ( $\mu_{pleio} = \mu_{mutcor} = 0$ ),  
192 traits are still capable of divergence, but do not follow trait optima closely  
193 since traits 3 and 4 get pulled away from their optima as traits 1 and 2  
194 increase to follow theirs (Figure 5). With the introduction of variation in  
195 genetic architecture through mutation ( $\mu_{pleio}, \mu_{mutcor} > 0$ ), average trait val-  
196 ues follow their optima more closely and the capability of trait divergence  
197 increases as mutation rates in genetic architecture increases, which leads to  
198 higher average population fitness values by generation 5000 (Figure 6). Also  
199 by generation 5000, simulations with higher pleiotropic connection mutation  
200 rates ( $\mu_{pleio} \geq 0.001$  or  $\mu_{mutcor} = 0.01$ ) have distinctly modular genetic cor-  
201 relation structures with stronger correlations between traits 1 and 2 than

202 between traits 3 and 4 (Figure 7). But at the highest pleiotropic connec-  
203 tivity mutation rate ( $\mu_{pleio} = 0.01$ ) the genetic integration of trait 3 with  
204 4 (and even trait 1 with 2) is no longer as strong (i.e., the genetic correla-  
205 tion drops, see Figure 7). An increase in pleiotropic connectivity variation  
206 has a greater impact on trait divergence evolution and modularization of the  
207 genetic architecture of the traits than the same increase in mutational cor-  
208 relation variation, which is evident when either  $\mu_{pleio}$  or  $\mu_{mutcor}$  is the same  
209 as the allelic mutation rate ( $\mu = 0.001$ ). Even when the mutation rate for  
210 mutational correlation is at the highest tested ( $\mu_{mutcor} = 0.01$ ), an increase  
211 in the mutation rate for pleiotropic connections still improves the ability for  
212 traits to diverge, which can be seen in the decrease in variance over replicate  
213 simulations (Figure 5).

214 *Effects of pleiotropic connectivity and mutational correlation evolution on*  
215 *rate and extent of trait decoupling*

216 When evolution of pleiotropic connections is possible ( $\mu_{pleio} > 0$ ), the most  
217 common allele in almost all cases is one that maintains connections to Traits  
218 1 and 2, but has lost connections to traits 3 and 4 after two mutational events.  
219 This allele is found in Locus 1 or 2 at a frequency of 0.873 averaged over the  
220 populations of all simulations where evolution of pleiotropic connections is  
221 possible. The allele goes to fixation or near fixation in one locus where its  
222 pleiotropic degree decreases from four to two, and this happens more rapidly  
223 as  $\mu_{pleio}$  increases (Figure 8). The decrease in pleiotropic degree resulting  
224 from the increase in frequency of this allele coincides with the modularization  
225 of genetic correlations, the divergence of traits and the increase in fitness.  
226 The proportion of times in which this particular allele becomes common in  
227 Locus 1 or in Locus 2 is approximately equal over all simulations (0.491 and  
228 0.509, respectively, over 300 simulations) and is never observed in both loci  
229 in any one individual.

230 When the mutation rate for pleiotropic connectivity ( $\mu_{pleio}$ ) is zero, mu-  
231 tational correlation evolution can still lead to trait divergence but this takes

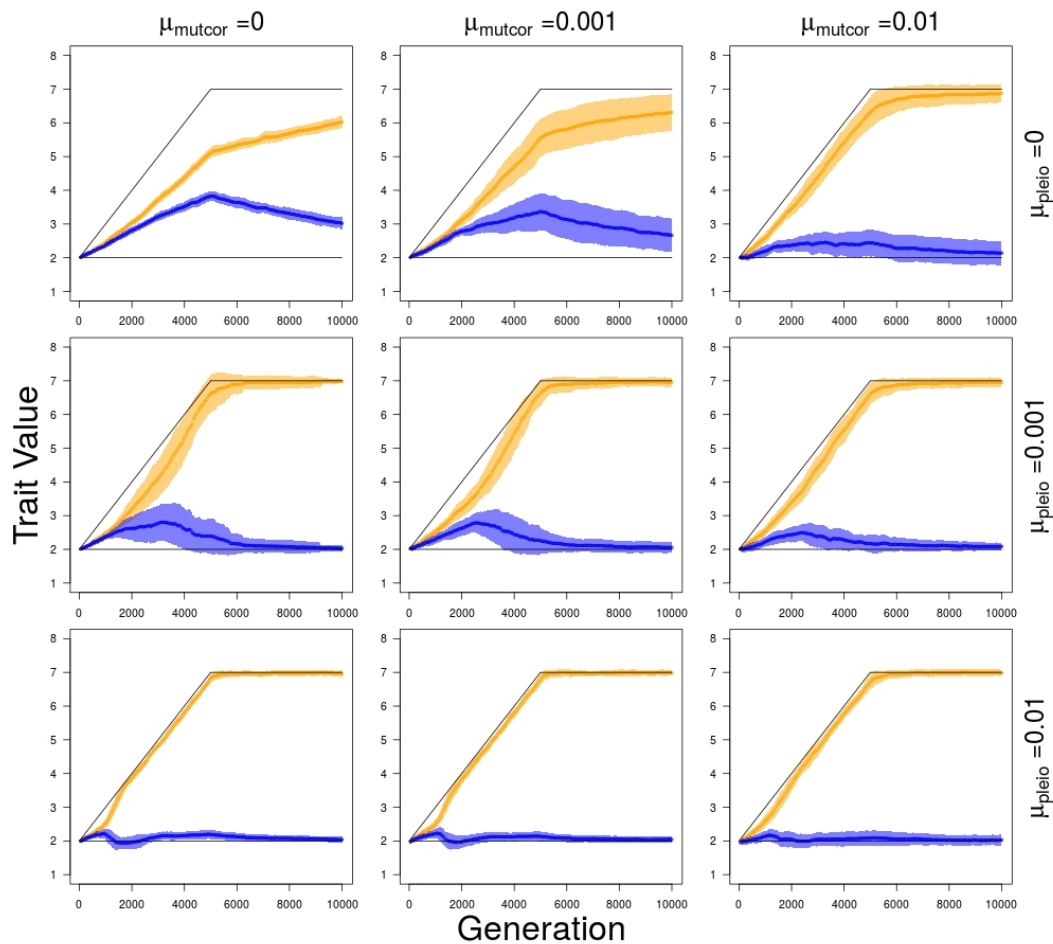

Figure 5: Trait value divergence over 5,000 generations of divergent selection on Traits 1 and 2 (Trait Module 1) followed by 5,000 generations of stabilizing selection for different combinations of mutation rate in pleiotropic connectivity ( $\mu_{pleio}$ ) and mutational correlations ( $\mu_{mutcor}$ ). Orange – average values of Traits 1 and 2; Blue – average values of Traits 3 and 4; Black – trait value optima for Trait Modules 1 and 2. Shaded regions show standard errors of the mean for 50 replicate simulations.

232 longer, does not diverge as fully, and therefore leads to lower population  
 233 mean fitness. Evolution of the mutational correlation occurs by a general de-  
 234 crease in all mutational correlations between traits at a rate determined by  
 235 the mutation rate of mutational correlations (Figure 9). When the mutation  
 236 rate at the mutational correlation loci is higher than the pleiotropic muta-

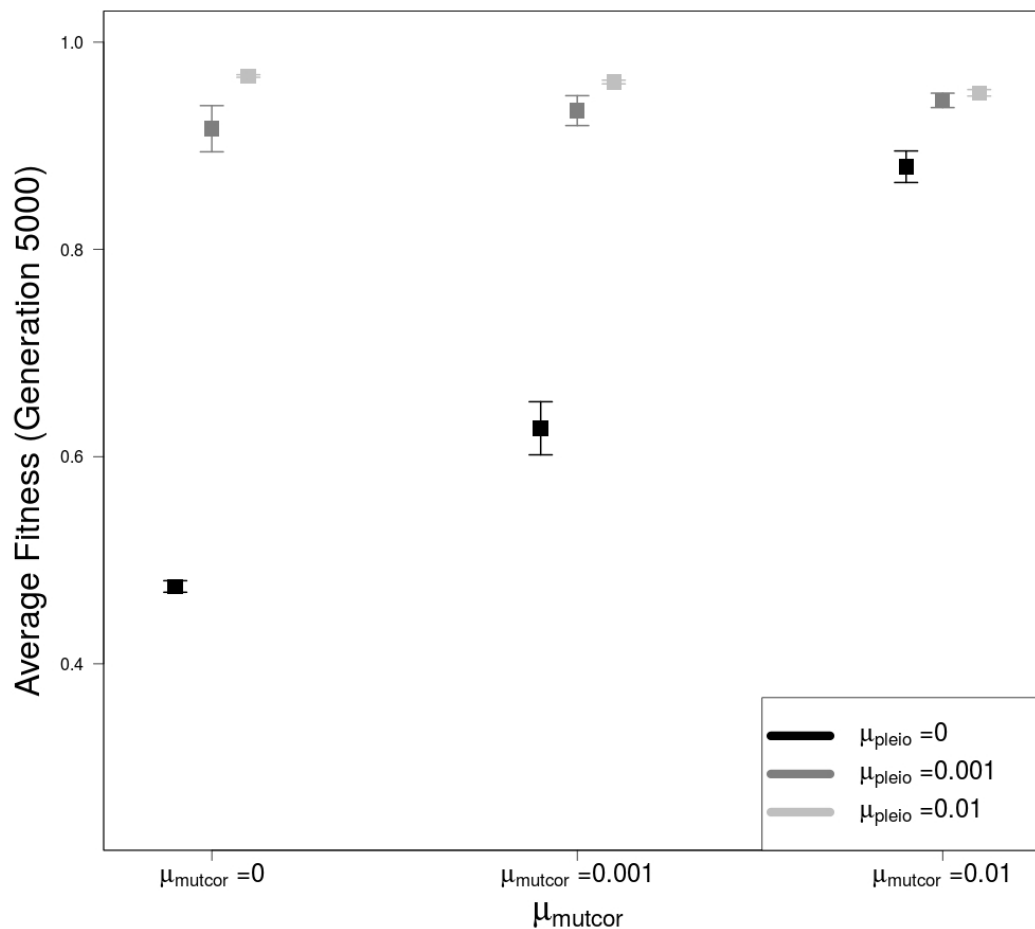

Figure 6: Average population fitness after 5,000 generations of divergent selection on Traits 1 and 2 (Trait Module 1) for different combinations of mutation rate in pleiotropic connectivity ( $\mu_{pleio}$ ) and mutational correlations ( $\mu_{mutcor}$ ). All error bars represent standard errors of the mean for 50 replicate simulations.

237 tion rate then genotypic patterns do emerge where one locus disconnected  
238 from Trait 3 combines with lower mutational correlations between Traits 1  
239 and 4 or 2 and 4, *or* a locus disconnected to Trait 4 combines with lower  
240 mutational correlations between Traits 1 and 3 or 2 and 3 (at frequencies of  
241 0.16 and 0.10 over 50 replicates, respectively). But even in the case with a  
242 higher mutation rate for mutational correlation than the pleiotropic connec-

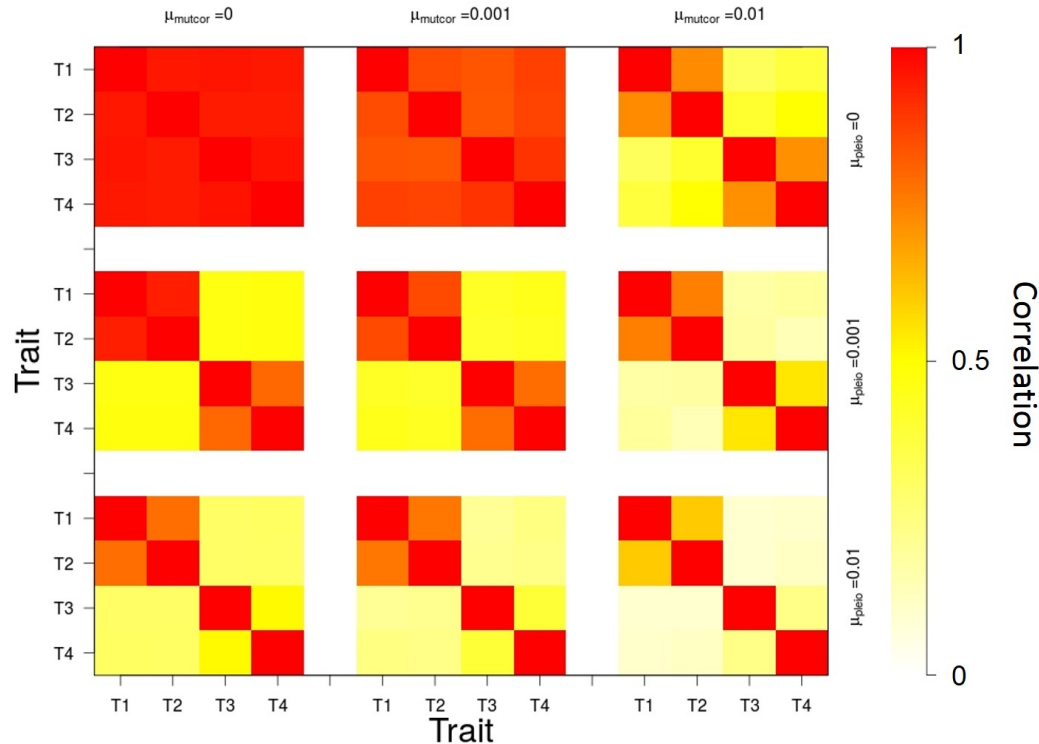

Figure 7: Genetic correlations between traits after 5,000 generations of divergent selection on Traits 1 and 2 (Trait Module 1) for different combinations of mutation rate in pleiotropic connectivity ( $\mu_{pleio}$ ) and mutational correlations ( $\mu_{mutcor}$ ). Red – higher genetic correlation. White – no genetic correlation

243 tivity mutation rates, full subfunctionalization (one locus loses connections  
 244 to Traits 3 and 4) is a possible outcome occurring in 18% of 50 replicates  
 245 after 5,000 generations.

246 *Effect of mutational correlation initial conditions set to zero ( $\rho_{\mu} = 0$  versus*  
 247  *$\rho_{\mu} = 0.99$ )*

248 In simulations where all mutational correlations are initialized at zero,  
 249 there is little to no constraint on trait divergence despite full pleiotropic  
 250 connectivity. This can be observed in trait values that follow their optima

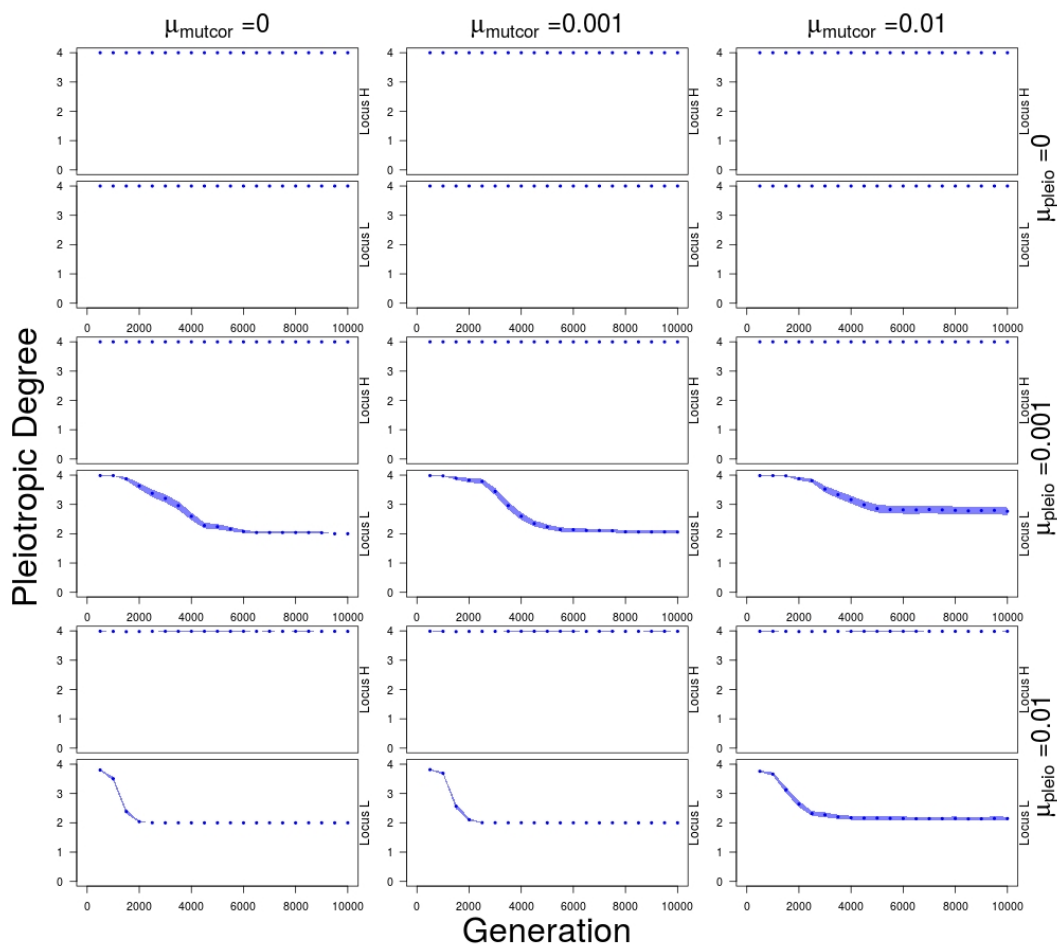

Figure 8: Average number of traits connected to each locus over 5,000 generations of divergent selection on Traits 1 and 2 (Trait Module 1) followed by 5,000 generations of stabilizing selection for different combinations of mutation rate in pleiotropic connectivity ( $\mu_{pleio}$ ) and mutational correlations ( $\mu_{mutcor}$ ). Loci are sorted so that locus with higher pleiotropic degree (Locus H) is always shown above and lower pleiotropic degree (Locus L) shown below. Shaded regions show standard errors of the mean for 50 replicate simulations.

251 closely, leading to little reduction in fitness as optima for Traits 1 and 2  
 252 diverge from Traits 3 and 4, with little evolution in mutational correlations  
 253 and pleiotropic degree during divergent selection (Figure 10). There are still  
 254 patterns of genetic architecture evolution as alleles with lowered pleiotropic  
 255 degree still emerge in the populations, but fixation is not common nor are

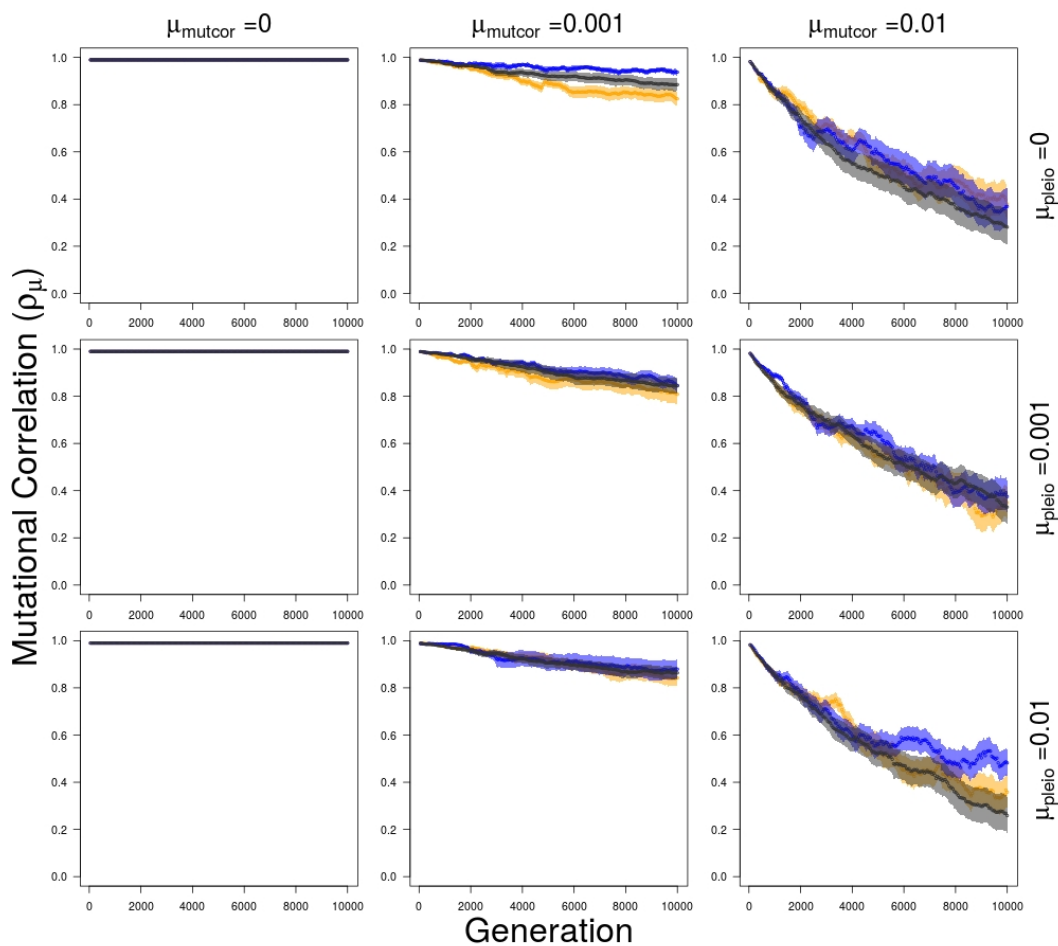

Figure 9: Average within and between trait module mutational correlation over 5,000 generations of divergent selection on Traits 1 and 2 (Trait Module 1) followed by 5,000 generations of stabilizing selection for different combinations of mutation rate in pleiotropic connectivity ( $\mu_{pleio}$ ) and mutational correlations ( $\mu_{mutcor}$ ). Orange – mutational correlation between Traits 1 and 2 (within Trait Module 1); Blue – mutational correlation between traits 3 and 4 (within Trait Module 2); Black – average mutational correlations between Traits 1 and 3, 1 and 4, 2 and 3, and 2 and 4 (between Trait Module 1 and 2). Shaded regions show standard errors of the mean for 50 replicate simulations.

256 any allelic patterns of mutational correlations.



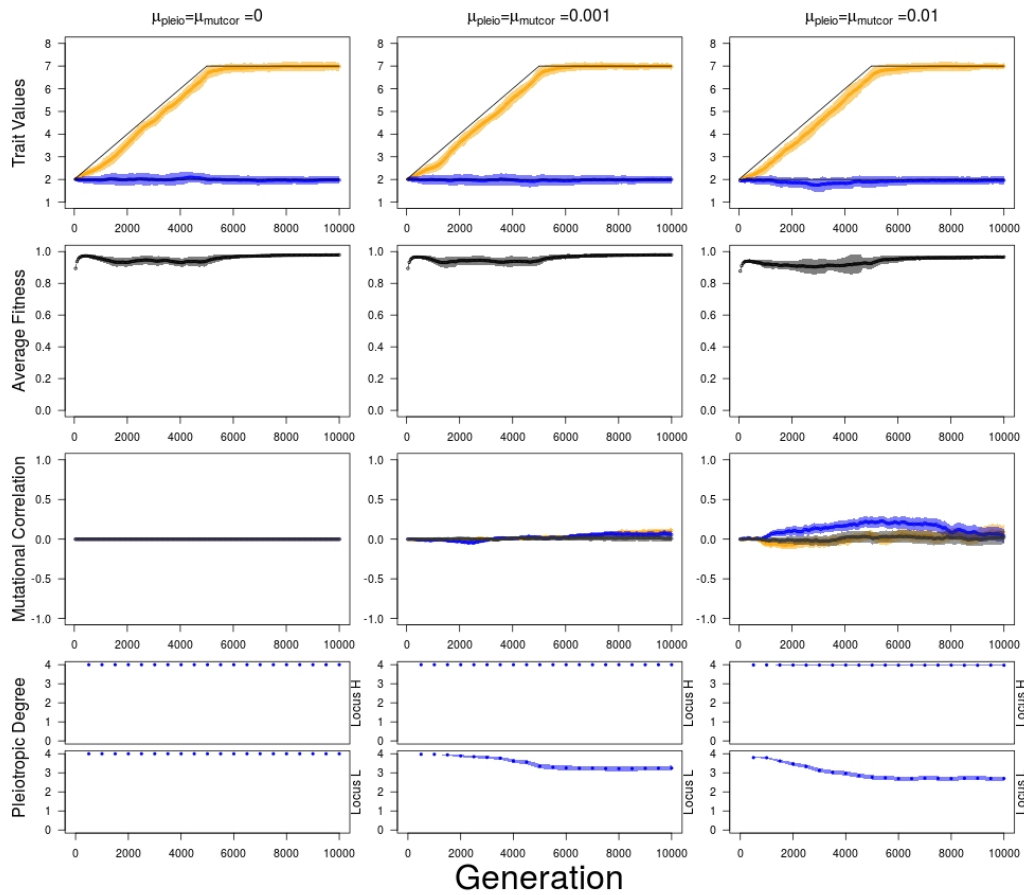

Figure 10: Average trait value, fitness, mutational correlation and pleiotropic degree, when all  $\rho_{\mu}$  values are initialized to 0, over 5,000 generations of divergent selection on Traits 1 and 2 (Trait Module 1) followed by 5,000 generations of stabilizing selection for different combinations of mutation rate in pleiotropic connectivity ( $\mu_{pleio}$ ) and mutational correlations ( $\mu_{mutcor}$ ). For pleiotropic degree, loci are sorted so that locus with higher pleiotropic degree (Locus H) is always shown above and lower pleiotropic degree (Locus L) shown below. Orange – Trait 1 and 2 values or mutational correlation between Traits 1 and 2 (Trait Module 1); Blue – Trait 3 and 4 values or mutational correlation between Traits 3 and 4 (Trait Module 2); Black – average mutational correlations between Traits 1 and 3, 1 and 4, 2 and 3, and 2 and 4 (between Trait Modules 1 and 2). Shaded regions show standard errors of the mean for 50 replicate simulations.

## 257 Discussion

258 *Evolution in pleiotropic connectivity and mutational correlation can lead to*  
 259 *trait divergence*

260 Previous models of genetic architecture evolution have shown that evo-  
 261 lution in pleiotropic connections and mutational correlation can influence

262 genetic correlation between traits and therefore responses to selection, but  
263 as far as we are aware this is the first time both have been allowed to evolve  
264 in the same model. When a genetic architecture is highly constraining to  
265 the decoupling of some traits from others, then evolution of the structure  
266 of the genetic architecture itself can clearly facilitate the rate and extent of  
267 trait divergence. Although genetic architecture may evolve through changes  
268 in pleiotropic connectivity between genes and traits, and in the mutational  
269 correlations between traits, the former leads to a greater release of genetic  
270 constraints and faster adaptation in the corridor selection regime. A qual-  
271 itative distinction exists between these two types of genetic constraints to  
272 decoupling for two reasons. First, genetic constraints based on mutational  
273 correlation distributions are more difficult targets of selection compared to  
274 pleiotropic connections because mutations on modifiers of genetic correla-  
275 tions do not affect the trait phenotypes directly, whereas a single allele that  
276 differs in its pleiotropic connectivity does. Second, mutational correlations  
277 require pleiotropic connections to be effectual on traits (there can be no mu-  
278 tational correlations if a QTL affects only one trait), whereas the latter can  
279 affect the rate of adaptation regardless of mutational correlation (Baatz and  
280 Wagner, 1997; Chebib and Guillaume, 2017).

281 The results of this study corroborate results from previous models of  
282 pleiotropic evolution. We observe that divergent selection in the form of the  
283 corridor model leads to modular genetic architecture with greater genetic cor-  
284 relations between traits *within* trait modules and lower correlations *between*  
285 trait modules. This was also the case in both Melo and Marroig (2015) and  
286 Pavlicev et al. (2011) under the corridor model. Unfortunately, it is unclear  
287 whether patterns of partial modular pleiotropy that were responsible for the  
288 emergence of genetic modularity in our study were also observed in these  
289 studies because they did not report the most common resulting genotypes  
290 after corridor selection. Melo and Marroig (2015) did however vary the mu-  
291 tation rate in pleiotropic connectivity (while keeping allelic mutation rate the

292 same) and found that when  $\mu_{pleio}$  was 10 times greater than  $\mu$ , there were  
293 higher within and between trait module correlation compared to when  $\mu_{pleio}$   
294 and  $\mu$  were the same. Though our results corroborate this relationship as  
295 well, we cannot deduce the state of the pleiotropic connections that led to  
296 those results in their simulations. Their study also did not include evolution  
297 in mutational correlations so it is not possible to do a comparison on the rel-  
298 ative effects of mutational correlation and pleiotropic connectivity evolution  
299 on patterns of genetic modularity. Pavlicev et al. (2011) had a deterministic  
300 model with rQTL (modifier loci) that affected the correlations between traits  
301 directly instead of affecting the pleiotropic connections, making it difficult  
302 to compare patterns of partial modular pleiotropic connectivity. Jones et al.  
303 (2007) found “extreme” variation among replicates in the average mutational  
304 correlation observed when  $\rho_{\mu}$  was capable of evolving, similar to what was  
305 observed in our study (as well as when simulations were run with the same  
306 parameter values as the Jones et al. (2007) study; Supplemental Figure S1).  
307 This variation of the evolution of mutational correlation is likely due to an  
308 unstable equilibrium in the adaptive landscape in which highly positive or  
309 negative mutational correlations have a selective advantage over mutational  
310 correlations closer to zero (Lande (1980); Zhang and Hill (2002); Jones et al.  
311 (2007); Supplemental Figure S2).

### 312 *Patterns of pleiotropy*

313 What explains the emergence of one dominant genotype that was ob-  
314 served with one locus losing its connections to Traits 3 and 4, and the other  
315 locus maintaining full pleiotropy? When mutational correlations are strong,  
316 genetic modularization should arise so that mutational effects can increase  
317 Traits 1 and 2 values without also increasing Traits 3 and 4, (especially when  
318 stabilizing selection is strong compared to directional selection). If stabilizing  
319 selection had been weaker and/or directional selection been much stronger,  
320 then more loci affecting the traits would have increased the proportion of ad-  
321 vantageous mutations allowing for divergence (Hansen, 2003). For the same

322 reason, we don't observe complete genetic modularization with one locus only  
323 connected to Traits 1 and 2, and the other only connected to Traits 3 and  
324 4. With both loci contributing to Traits 1 and 2, there is more mutational  
325 input to increase their values, giving support to the idea that intermediate  
326 levels of genetic integration will maximize evolvability when pleiotropic ef-  
327 fects are all positive (Hansen, 2003). Also, since we were interested in the  
328 evolution of genetic architectures allowing trait decoupling, we started our  
329 simulations with a highly genetically integrated, monomorphic population.  
330 This makes evolution in our model dependent on de-novo mutations and as  
331 traits diverged, the negative effects of pleiotropy on traits under stabilizing  
332 selection increased, leading to modularization in the genetic architecture.  
333 But, if we had simulated genetic architectures where the allelic mutation  
334 rate ( $\mu$ ) was high enough and/or selection acted on many loci with small  
335 effects, pleiotropy may not have been as constraining, and integrated genetic  
336 architectures (loci affecting all traits) could be more evolvable. Whether in-  
337 tegrated or modular genetic architectures will evolve in response to divergent  
338 selection is dependent on the relative effects of mutation and selection on the  
339 different traits (Pavlicev and Hansen, 2011). This also would have been true  
340 if standing genetic variation had already existed in pleiotropic connectivity  
341 and mutational correlations in a population prior to divergent selection. We  
342 could imagine that many possible combinations of pleiotropic connectivity  
343 and mutational correlation alleles that allow for increased variation and re-  
344 duced covariation between traits could also exist. In those scenarios, genetic  
345 modularization may not be associated with trait divergence.

346 The results we obtain in this study are also related to work done on the  
347 evolutionary fate of duplicated, pleiotropic genes (Ohno, 1970; Hahn, 2009;  
348 Innan and Kondrashov, 2010; Guillaume and Otto, 2012). Previous models  
349 describe the conditions under which both genes remained fully pleiotropic,  
350 which is expected to be favorable when there is selection for increased dosage  
351 as we had for traits 1 and 2 (Ohno, 1970). There is some empirical evidence

352 of this in ribosomal RNA, histone genes, as well as amylase genes in humans  
353 with high starch diets (Zhang, 2003; Perry et al., 2007; Qian et al., 2010).  
354 Other models describe when one or both genes lose their connection to some  
355 traits, known as subfunctionalization, if there is a relaxation of selection after  
356 duplication (Force et al., 1999; Lynch and Force, 2000). Empirical evidence  
357 for subfunctionalization exists for vertebrate limb evolution, as discussed in  
358 the introduction, as well as pathway specialization in plants (Bomblies and  
359 Doebley, 2006; Des Marais and Rausher, 2008). Compared to models with  
360 selection for increased dosage, our model has selection only for higher values  
361 in Traits 1 and 2, whereas selection for increased values in all four traits is  
362 expected to maintain all pleiotropic connections. The difference compared to  
363 neutral models where subfunctionalization is the result is that in our model  
364 there is no relaxation of selection due to duplication and redundancy. In that  
365 case, Guillaume and Otto (2012) showed that the maintenance of pleiotropy  
366 in one gene and subfunctionalization in the other (the most common outcome  
367 in our simulations) is predicted when there is asymmetry in either the trait  
368 contributions to fitness or in the expression levels of the genes. The gene  
369 with higher expression was predicted to remain fully pleiotropic, with loss of  
370 pleiotropy in the second, less expressed gene. Our results fit very well with  
371 that later outcome, although the conditions were different. In Guillaume and  
372 Otto (2012), a fitness trade-off emerged from the competitive allocation of the  
373 gene product (amount of protein produced) between two traits under positive  
374 selection (i.e., increased allocation to one trait reduced allocation to the other  
375 trait). The fitness trade-off in our model arose from the corridor model of  
376 selection whereby increased additive contributions to Traits 1 and 2 via fully  
377 pleiotropic mutations with correlated allelic values trade-off negatively with  
378 Traits 3 and 4 under stabilizing selection. The trade-off is quickly attenuated  
379 when the mutational correlations between traits under divergent selection  
380 decreases. Mutation in pleiotropic connections of the QTL was nevertheless  
381 more efficient in breaking the constraint to trait divergence. It is also a

382 more plausible mechanism since mutations changing a transcription factors's  
383 access to transcription binding sites may cause a drastic change associated  
384 with a change in pleiotropic connectivity.

### 385 *Empirical evidence for mutational correlation and pleiotropy*

386 The pleiotropic connections and mutational correlations in our model ab-  
387 stract out the types of molecular level changes that may lead to changes in  
388 genetic correlations between traits. Some examples of variation in pleiotropic  
389 connectivity come from empirical studies on transcriptional regulation. For  
390 example, expression of the *Tbx4* gene (described earlier) is required not only  
391 for hindlimb development but is also expressed in genital development (Chap-  
392 man et al., 1996). Although the upstream enhancer of *Tbx4*, hindlimb en-  
393 hancer B (or HLEB), is functional in both hindlimb and genital development  
394 in both mice and lizards, HLEB appears to have lost its hindlimb enhancer  
395 function in snakes due to mutations in one of the enhancer's binding regions  
396 (Infante et al., 2015). A more recent example comes from two species of  
397 *Drosophila* that diverged only 500,000 years ago. *D. yakuba* has both hypan-  
398 drial and sex comb bristles whereas *D. santomea* has only sex comb bristles  
399 (Rice and Rebeiz, 2019). Quantitative trait mapping crosses between the  
400 species and with *D. melanogaster* revealed that a single nucleotide change in  
401 a regulatory enhancer of the *scute* gene, which promotes bristle development,  
402 was responsible for *D. santomea* losing its hypandrial bristles and increasing  
403 its sex comb bristle number (Nagy et al., 2018). These examples provide  
404 evidence that mutations in DNA binding sites can affect a gene's pleiotropic  
405 degree, allowing for evolution of trait decoupling.

406 Correlated mutational effects, on the other hand, may arise from muta-  
407 tions that cause correlated effects in more than one of a gene's molecular func-  
408 tions or from mutations causing correlated effects in a gene product's multiple  
409 processes, but empirical data is still needed to discover the mechanisms un-  
410 derlying mutational correlations (Hodgkin, 1998; Wagner and Zhang, 2011).  
411 Even if the specific molecular mechanism that is the cause of correlation is

412 not known, it is still possible to estimate the genomic  $\mathbf{M}$ -matrix which de-  
413 scribes the combined pattern of (co)variation arising from mutations in all  
414 loci that affect the traits of interest. Mutation accumulation experiments in  
415 *D. melanogaster* (Houle and Fierst, 2013) or *C. elegans* (Estes et al., 2005)  
416 provide examples of such genomic  $\mathbf{M}$ -matrix estimates and show the exist-  
417 ence of strong mutational correlation among morphological and life-history  
418 traits. Additionally, mutational correlations in *C. elegans* seem to corre-  
419 spond to phenotypic correlations among traits after removing environmental  
420 correlations and suggest that pleiotropy is somewhat restricted within traits  
421 of related function (Estes et al., 2005). Unfortunately, the  $\mathbf{M}$ -matrix is only  
422 a summary statistic, which represents patterns of mutational variance across  
423 traits. It does not necessarily represent the correlations of mutational effects  
424 underlying that mutational variance between traits, which may be hidden  
425 due to multiple effects cancelling each other out.

426 It is also possible to discover evidence of modular pleiotropy from genome-  
427 wide studies using gene knock-out/-down experiments as was performed in  
428 yeast (Dudley et al., 2005; Güldener et al., 2005; Ohya et al., 2005), *C. elegans*  
429 (Sönnichsen et al., 2005), and the house mouse (Bult et al., 2008), which  
430 have shown that whole-gene pleiotropy is variable (not all genes affect all  
431 traits) and often modular (Wang et al., 2010; Wagner and Zhang, 2011).  
432 QTL studies further show variable pleiotropy in *D. melanogaster* (Mezey  
433 et al., 2005), threespine stickleback (Albert et al., 2008), the house mouse  
434 (Cheverud et al., 1997; Kenney-Hunt et al., 2008; Miller et al., 2014), and  
435 *A. thaliana* (Juenger et al., 2005), among others (Porto et al., 2016).

436 One empirical study based on human patient data manages to link mu-  
437 tational correlation with modular variation of pleiotropy by measuring both  
438 the genomic  $\mathbf{M}$ -matrices and the pleiotropic degree of main and epistatic  
439 effects of mutations affecting the replicative capacity (fitness) of HIV-1 in  
440 different drug environments (Polster et al., 2016). In doing so, they dis-  
441 covered that epistasis can affect the pleiotropic degree of single mutations

442 producing modular genetic architectures and that epistatic-pleiotropic effect  
443 modules matched modules of fitness co-variation among drugs. These results  
444 suggest that epistasis may be fundamental in shaping the genetic integration  
445 itself, which may allow organisms to enhance their evolvability in the face of  
446 selection (Pavlicev et al., 2008, 2011; Pavlicev and Cheverud, 2015).

## 447 **Conclusion**

448 Both pleiotropic connectivity and mutational correlation can constrain  
449 the divergence of traits under divergent selection, but when both can evolve,  
450 trait divergence occurs because pleiotropic connections are broken between  
451 loci and traits under stabilizing selection. The evolution of pleiotropic con-  
452 nectivity is favoured because it is an easier target of selection than a distri-  
453 bution of mutational effects. The most commonly observed genotype thus  
454 includes one locus that maintains connections to both traits under direc-  
455 tional selection and both traits under stabilizing selection, and the other  
456 locus losing its connection to the traits under stabilizing selection (subfunc-  
457 tionalization). The subfunctionalization of one locus allows it to contribute  
458 to increasingly divergent trait values in the traits under directional selection  
459 without changing the trait values of the other traits, which leads to separate  
460 genetic modules. These results indicate that partial subfunctionalization is  
461 sufficient to allow genetic decoupling and the divergence of traits with little  
462 to no loss of average fitness.

## 463 **Acknowledgments**

464 This manuscript benefited from the constructive comments provided by  
465 Thomas F. Hansen, Mihaela Pavlicev, Joachim Hermisson, Nicholas Barton,  
466 and an anonymous reviewer of the *Genetics* journal. J.C. and F.G. were  
467 supported by the Swiss National Science Foundation, grant PP00P3\_144846  
468 and PP00P3\_176965 to F.G.



469 **Author Contributions**

470 J.C. performed software modification for model implementation and ac-  
471 quisition of data, as well as drafting of manuscript. J.C. and F.G. performed  
472 study conception and design, analysis and interpretation of data, and critical  
473 revision of manuscript.

474 **Data Archival**

475 The data and initialization files for this study are available online through  
476 Zenodo online repository at: <https://zenodo.org/record/3980997#.XzPnFcBK70>  
477 and code for simulations can be found at: [https://github.com/jmchebib/nemo\\_evolving\\_pleio](https://github.com/jmchebib/nemo_evolving_pleio)

478 **Conflict of interest disclosure**

479 The authors of this article declare that they have no financial conflict of  
480 interest with the content of this article.

481 Supplemental

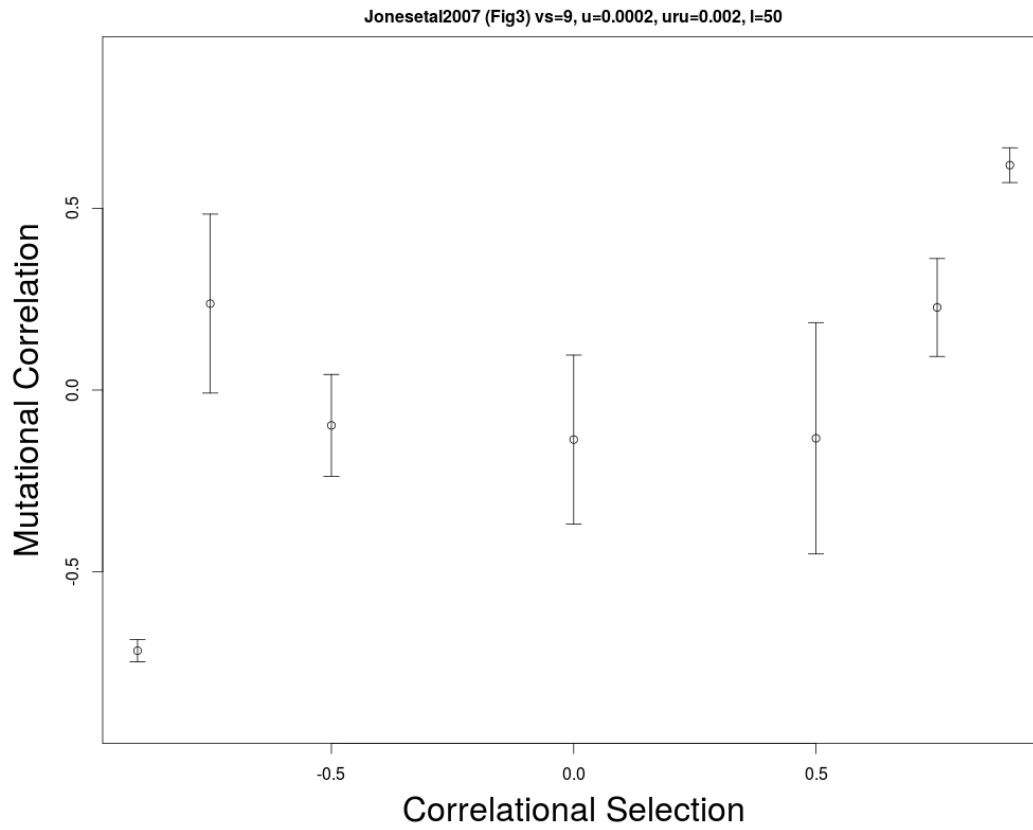

Figure S1: Average mutational correlation  $\rho_\mu$  values for different values of correlational selection  $\rho_\omega$ . Parameter values were chosen to match those used in Jones et al. 2007 wherever possible and averages were taken over values from every five generations after burn-in between generation 10,000 and 20,000. Number of loci = 50, Number of traits = 2,  $N = 2372$ ,  $\omega^2 = 9$ ,  $\mu = 0.0002$ ,  $\mu_{mutcor} = 0.002$ , and  $\alpha^2 = 0.05$ .

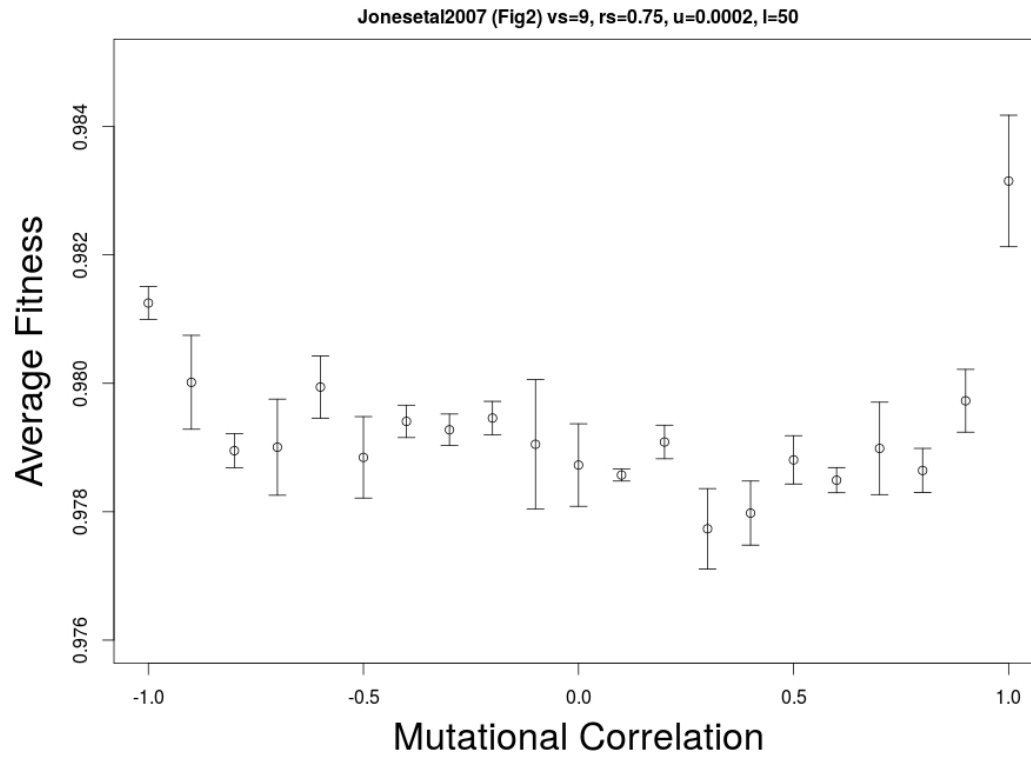

Figure S2: Average fitness for different values of mutational correlation (static). Parameter values were chosen to match those used in Jones et al. 2007 wherever possible and averages were taken over values from every five generations after burn-in between generation 10,000 and 15,000. Number of loci = 50, Number of traits = 2,  $N = 2372$ ,  $\omega^2 = 9$ ,  $\rho_\omega = 0.75$ ,  $\mu = 0.0002$ , and  $\alpha^2 = 0.05$ .

482 **References**

483 Albert, A. Y. K., Sawaya, S., Vines, T. H., Knecht, A. K., Miller, C. T.,  
484 Summers, B. R., Balabhadra, S., Kingsley, D. M., and Schluter, D. (2008).  
485 The genetics of adaptive shape shift in stickleback: pleiotropy and effect  
486 size. *Evolution*, 62(1):76–85.

487 Arnold, S. J. (1992). Constraints on phenotypic evolution. *The American*  
488 *Naturalist*, 140:S85–S107.

489 Baatz, M. and Wagner, G. P. (1997). Adaptive inertia caused by hidden  
490 pleiotropic effects. *Theoretical Population Biology*, 51(1):49–66.

491 Bomblies, K. and Doebley, J. F. (2006). Pleiotropic effects of the duplicate  
492 maize floricaula/leafy genes *zfl1* and *zfl2* on traits under selection during  
493 maize domestication. *Genetics*, 172(1):519–531.

494 Bult, C. J., Eppig, J. T., Kadin, J. A., Richardson, J. E., Blake, J. A.,  
495 Airey, M. T., Anagnostopoulos, A., Babiuk, R., Baldarelli, R. M., Baya,  
496 M., et al. (2008). The mouse genome database (mgd): mouse biology and  
497 model systems. *Nucleic acids research*, 36(suppl 1):D724–D728.

498 Bürger, R. (1986). Constraints for the evolution of functionally coupled char-  
499 acters: a nonlinear analysis of a phenotypic model. *Evolution*, 40(1):182–  
500 193.

501 Chapman, D. L., Garvey, N., Hancock, S., Alexiou, M., Agulnik, S. I.,  
502 Gibson-Brown, J. J., Cebra-Thomas, J., Bollag, R. J., Silver, L. M., and  
503 Papaioannou, V. E. (1996). Expression of the t-box family genes, *tbx1*–  
504 *tbx5*, during early mouse development. *Developmental dynamics: an of-*  
505 *ficial publication of the American Association of Anatomists*, 206(4):379–  
506 390.

- 507 Chebib, J. and Guillaume, F. (2017). What affects the predictability of  
508 evolutionary constraints using a g-matrix? the relative effects of modular  
509 pleiotropy and mutational correlation. *Evolution*.
- 510 Cheverud, J. M., Routman, E. J., and Irschick, D. J. (1997). Pleiotropic  
511 effects of individual gene loci on mandibular morphology. *Evolution*,  
512 51(6):2006–2016.
- 513 Crow, J. F. and Kimura, M. (1964). The theory of genetic loads. *Proc. XI*  
514 *Int. Congr. Genetics*, 2:495–505.
- 515 Des Marais, D. L. and Rausher, M. D. (2008). Escape from adaptive conflict  
516 after duplication in an anthocyanin pathway gene. *Nature*, 454(7205):762.
- 517 Dudley, A. M., Janse, D. M., Tanay, A., Shamir, R., and Church, G. M.  
518 (2005). A global view of pleiotropy and phenotypically derived gene func-  
519 tion in yeast. *Molecular systems biology*, 1(1):1–11.
- 520 Estes, S., Ajie, B. C., Lynch, M., and Phillips, P. C. (2005). Spontaneous  
521 mutational correlations for life-history, morphological and behavioral char-  
522 acters in caenorhabditis elegans. *Genetics*, 170(2):645–653.
- 523 Force, A., Lynch, M., Pickett, F. B., Amores, A., Yan, Y.-l., and Postleth-  
524 wait, J. (1999). Preservation of duplicate genes by complementary, degen-  
525 erative mutations. *Genetics*, 151(4):1531–1545.
- 526 Graham, A. and McGonnell, I. (1999). Limb development: Farewell to arms.  
527 *Current biology*, 9(10):R368–R370.
- 528 Guillaume, F. and Otto, S. P. (2012). Gene functional trade-offs and the  
529 evolution of pleiotropy. *Genetics*, 192:1389–1409.
- 530 Guillaume, F. and Rougemont, J. (2006). Nemo:an evolutionary and popu-  
531 lation genetics programming framework. *Bioinformatics*, 22:2556–2557.

- 532 Güldener, U., Münsterkötter, M., Kastenmüller, G., Strack, N., van Helden,  
533 J., Lemer, C., Richelles, J., Wodak, S. J., García-Martínez, J., Pérez-Ortín,  
534 J. E., et al. (2005). Cygd: the comprehensive yeast genome database.  
535 *Nucleic acids research*, 33(suppl 1):D364–D368.
- 536 Hahn, M. W. (2009). Distinguishing among evolutionary models for the  
537 maintenance of gene duplicates. *Journal of Heredity*, 100(5):605–617.
- 538 Han, M. V., Demuth, J. P., McGrath, C. L., Casola, C., and Hahn, M. W.  
539 (2009). Adaptive evolution of young gene duplicates in mammals. *Genome*  
540 *research*, 19(5):859–867.
- 541 Hansen, T. F. (2003). Is modularity necessary for evolvability?: Remarks on  
542 the relationship between pleiotropy and evolvability. *Biosystems*, 69(2):83–  
543 94.
- 544 Hansen, T. F. (2006). The evolution of genetic architecture. *Ann. Rev. Ecol.*  
545 *Evol. Syst.*, 37:123–157.
- 546 Hlusko, L. J. (2016). Elucidating the evolution of hominid dentition in the age  
547 of phenomics, modularity, and quantitative genetics. *Annals of Anatomy-*  
548 *Anatomischer Anzeiger*, 203:3–11.
- 549 Hodgkin, J. (1998). Seven types of pleiotropy. *Int. J. Dev. Biol.*, 42(3):501–  
550 505.
- 551 Holley, S. A. (2007). The genetics and embryology of zebrafish metamerism.  
552 *Developmental dynamics: an official publication of the American Associa-*  
553 *tion of Anatomists*, 236(6):1422–1449.
- 554 Houle, D. and Fierst, J. (2013). Properties of spontaneous mutational vari-  
555 ance and covariance for wing size and shape in *Drosophila melanogaster*.  
556 *Evolution*, 67(4):1116–1130.

- 557 Infante, C. R., Mihala, A. G., Park, S., Wang, J. S., Johnson, K. K., Laud-  
558 erdale, J. D., and Menke, D. B. (2015). Shared enhancer activity in the  
559 limbs and phallus and functional divergence of a limb-genital cis-regulatory  
560 element in snakes. *Developmental cell*, 35(1):107–119.
- 561 Innan, H. and Kondrashov, F. (2010). The evolution of gene duplications:  
562 classifying and distinguishing between models. *Nature Reviews Genetics*,  
563 11(2):97.
- 564 Jiang, X., Liu, B., Jiang, J., Zhao, H., Fan, M., Zhang, J., Fan, Z., and Jiang,  
565 T. (2008). Modularity in the genetic disease-phenotype network. *FEBS*  
566 *letters*, 582(17):2549–2554.
- 567 Jones, A. G., Arnold, S. J., and Bürger, R. (2003). Stability of the g-matrix in  
568 a population experiencing pleiotropic mutation, stabilizing selection, and  
569 genetic drift. *Evolution*, 57:1747–1760.
- 570 Jones, A. G., Arnold, S. J., and Bürger, R. (2007). The mutation matrix and  
571 the evolution of evolvability. *Evolution*, 61(4):727–745.
- 572 Juenger, T., Perez-Perez, J. M., Bernal, S., and Micol, J. L. (2005). Quanti-  
573 tative trait loci mapping of floral and leaf morphology traits in *Arabidopsis*  
574 *thaliana*: evidence for modular genetic architecture. *Evol. Dev.*, 7(3):259–  
575 271.
- 576 Kenney-Hunt, J. P., Wang, B., Norgard, E. A., Fawcett, G., Falk, D.,  
577 Pletscher, L. S., Jarvis, J. P., Roseman, C., Wolf, J., and Cheverud, J. M.  
578 (2008). Pleiotropic patterns of quantitative trait loci for 70 murine skeletal  
579 traits. *Genetics*, 178(4):2275–2288.
- 580 Lande, R. (1979). Quantitative genetic analysis of multivariate evolution,  
581 applied to brain:body size allometry. *Evolution*, 33:402–416.
- 582 Lande, R. (1980). The genetic covariance between characters maintained by  
583 pleiotropic mutations. *Genetics*, 94(1):203–215.

- 584 Lynch, M. and Force, A. (2000). The probability of duplicate gene preserva-  
585 tion by subfunctionalization. *Genetics*, 154(1):459–473.
- 586 Martin, G. and Lenormand, T. (2006). A general multivariate extension of  
587 fisher’s geometrical model and the distribution of mutation fitness effects  
588 across species. *Evolution*, 60(5):893–907.
- 589 Melo, D. and Marroig, G. (2015). Directional selection can drive the evolution  
590 of modularity in complex traits. *Proc. Natl. Acad. Sci. U.S.A.*, 112:470–  
591 475.
- 592 Mezey, J. G., Houle, D., and Nuzhdin, S. V. (2005). Naturally segregating  
593 quantitative trait loci affecting wing shape of drosophila melanogaster.  
594 *Genetics*, 169(4):2101–2113.
- 595 Miller, C. T., Glazer, A. M., Summers, B. R., Blackman, B. K., Norman,  
596 A. R., Shapiro, M. D., Cole, B. L., Peichel, C. L., Schluter, D., and Kings-  
597 ley, D. M. (2014). Modular skeletal evolution in sticklebacks is controlled  
598 by additive and clustered quantitative trait loci. *Genetics*, 197(1):405–420.
- 599 Minguillon, C., Gibson-Brown, J. J., and Logan, M. P. (2009). Tbx4/5 gene  
600 duplication and the origin of vertebrate paired appendages. *Proceedings of*  
601 *the National Academy of Sciences*, pages pnas–0910153106.
- 602 Muller, H. J. (1936). Bar duplication. *Science*, 83(2161):528–530.
- 603 Nagy, O., Nuez, I., Savisaar, R., Peluffo, A. E., Yassin, A., Lang, M., Stern,  
604 D. L., Matute, D. R., David, J. R., and Courtier-Orgogozo, V. (2018).  
605 Correlated evolution of two copulatory organs via a single cis-regulatory  
606 nucleotide change. *Current Biology*, 28(21):3450–3457.
- 607 Newman, S. A. (2020). Cell differentiation: What have we learned in 50  
608 years? *Journal of theoretical biology*, 485:110031.
- 609 Ohno, S. (1970). Evolution by gene duplication springer. *New York*.



- 610 Ohya, Y., Sese, J., Yukawa, M., Sano, F., Nakatani, Y., Saito, T. L., Saka, A.,  
611 Fukuda, T., Ishihara, S., Oka, S., et al. (2005). High-dimensional and large-  
612 scale phenotyping of yeast mutants. *Proceedings of the National Academy  
613 of Sciences of the United States of America*, 102(52):19015–19020.
- 614 Orr, H. A. (2000). Adaptation and the cost of complexity. *Evolution*,  
615 54(1):13–20.
- 616 Pavlicev, M. and Cheverud, J. M. (2015). Constraints evolve: context de-  
617 pendency of gene effects allows evolution of pleiotropy. *Ann. Rev. Ecol.  
618 Evol. Syst.*, 46:413–434.
- 619 Pavlicev, M., Cheverud, J. M., and Wagner, G. P. (2011). Evolution of  
620 adaptive phenotypic variation patterns by direct selection for evolvabil-  
621 ity. *Proceedings of the Royal Society of London B: Biological Sciences*,  
622 11:rspb20102113.
- 623 Pavlicev, M. and Hansen, T. F. (2011). Genotype-phenotype maps maximiz-  
624 ing evolvability: Modularity revisited. *Evolutionary Biology*, 38(4):371–  
625 389.
- 626 Pavlicev, M., Kenney-Hunt, J. P., Norgard, E. A., Roseman, C. C., Wolf,  
627 J. B., and Cheverud, J. M. (2008). Genetic variation in pleiotropy: dif-  
628 ferential epistasis as a source of variation in the allometric relationship  
629 between long bone lengths and body weight. *Evolution*, 62(1):199–213.
- 630 Perry, G. H., Dominy, N. J., Claw, K. G., Lee, A. S., Fiegler, H., Redon, R.,  
631 Werner, J., Villanea, F. A., Mountain, J. L., Misra, R., et al. (2007). Diet  
632 and the evolution of human amylase gene copy number variation. *Nature  
633 genetics*, 39(10):1256.
- 634 Petit, F., Sears, K. E., and Ahituv, N. (2017). Limb development: a paradigm  
635 of gene regulation. *Nature Reviews Genetics*, 18(4):245.

- 636 Polster, R., Petropoulos, C. J., Bonhoeffer, S., and Guillaume, F. (2016).  
637 Epistasis and pleiotropy affect the modularity of the genotype–phenotype  
638 map of cross-resistance in hiv-1. *Molecular Biology and Evolution*,  
639 33(12):3213–3225.
- 640 Porto, A., Schmelter, R., VandeBerg, J. L., Marroig, G., and Cheverud,  
641 J. M. (2016). Evolution of the genotype-to-phenotype map and the cost  
642 of pleiotropy in mammals. *Genetics*, 204(4):1601–1612.
- 643 Qian, W., Liao, B.-Y., Chang, A. Y.-F., and Zhang, J. (2010). Maintenance  
644 of duplicate genes and their functional redundancy by reduced expression.  
645 *Trends in Genetics*, 26(10):425–430.
- 646 Rastogi, S. and Liberles, D. A. (2005). Subfunctionalization of duplicated  
647 genes as a transition state to neofunctionalization. *BMC evolutionary bi-*  
648 *ology*, 5(1):28.
- 649 Rice, G. and Rebeiz, M. (2019). Evolution: How many phenotypes do regu-  
650 latory mutations affect? *Current Biology*, 29(1):R21–R23.
- 651 Rueffler, C., Hermisson, J., and Wagner, G. P. (2012). Evolution of functional  
652 specialization and division of labor. *Proceedings of the National Academy*  
653 *of Sciences*, 109(6):E326–E335.
- 654 Smith, S. D. (2016). Pleiotropy and the evolution of floral integration. *New*  
655 *Phytologist*, 209(1):80–85.
- 656 Sönnichsen, B., Koski, L., Walsh, A., Marschall, P., Neumann, B., Brehm,  
657 M., Alleaume, A.-M., Artelt, J., Bettencourt, P., Cassin, E., et al. (2005).  
658 Full-genome rnaï profiling of early embryogenesis in caenorhabditis elegans.  
659 *Nature*, 434(7032):462–469.
- 660 Stern, D. L. (2000). Perspective: evolutionary developmental biology and  
661 the problem of variation. *Evolution*, 54(4):1079–1091.

- 662 Wagner, G. (1984). Coevolution of functionally constrained characters: pre-  
663 requisites for adaptive versatility. *BioSystems*, 17(1):51–55.
- 664 Wagner, G. P. (1989). Multivariate mutation-selection balance with con-  
665 strained pleiotropic effects. *Genetics*, 122(1):223–234.
- 666 Wagner, G. P. and Altenberg, L. (1996). Perspective: complex adaptations  
667 and the evolution of evolvability. *Evolution*, 50(3):967–976.
- 668 Wagner, G. P., Erkenbrack, E. M., and Love, A. C. (2019). Stress-induced  
669 evolutionary innovation: A mechanism for the origin of cell types. *BioEs-  
670 says*, 41(4):1800188.
- 671 Wagner, G. P. and Zhang, J. (2011). The pleiotropic structure of the  
672 genotype–phenotype map: the evolvability of complex organisms. *Nat.  
673 Rev. Genet.*, 12(3):204–213.
- 674 Wang, Z., Liao, B. Y., and Zhang, J. Z. (2010). Genomic patterns of  
675 pleiotropy and the evolution of complexity. *Proc. Natl. Acad. Sci. U.S.A.*,  
676 107:18034–18039.
- 677 Welch, J. J. and Waxman, D. (2003). Modularity and the cost of complexity.  
678 *Evolution*, 57(8):1723–1734.
- 679 Zhang, J. (2003). Evolution by gene duplication: an update. *Trends in  
680 ecology & evolution*, 18(6):292–298.
- 681 Zhang, X. S. and Hill, W. G. (2002). Joint effects of pleiotropic selection and  
682 stabilizing selection on the maintenance of quantitative genetic variation  
683 at mutation-selection balance. *Genetics*.
